# Supplementary material
Source: ML conference proceedings conference paper supplement (https://openaccess.thecvf.com/content/WACV2023/html/Ramesh_SIUNet_Sparsity_Invariant_WACV_2023_paper.html)
Supplement: Supplementary file 3 [file Ramesh_SIUNet_Sparsity_Invariant_WACV_2023_supplemental.zip]

Archive with 61 entries (23 files):
- 0620-supp/0620-supp.pdf
- 0620-supp/code/
- 0620-supp/code/kitti/
- 0620-supp/code/kitti/ablation_study_test1.py
- 0620-supp/code/kitti/ablation_study_test2_step1.py
- 0620-supp/code/kitti/ablation_study_test2_step2.py
- 0620-supp/code/kitti/ablation_study_test3.py
- 0620-supp/code/kitti/ablation_study_test4.py
- 0620-supp/code/kitti/ablation_study_test5_step1.py
- 0620-supp/code/kitti/ablation_study_test5_step2.py
- 0620-supp/code/kitti/ablation_study_test6_step1.py
- 0620-supp/code/kitti/ablation_study_test6_step2.py
- 0620-supp/code/kitti/ablation_study_test7_step1.py
- 0620-supp/code/kitti/ablation_study_test7_step2.py
- 0620-supp/code/kitti/data_augmentation.py
- 0620-supp/code/kitti/test.py
- 0620-supp/code/nyu/
- 0620-supp/code/nyu/convert_hdf5_to_npy.py
- 0620-supp/code/nyu/test.py
- 0620-supp/code/nyu/train.py
- 0620-supp/code/requirements.txt
- 0620-supp/dataset/
- 0620-supp/dataset/kitti/
- 0620-supp/dataset/kitti/train/
- 0620-supp/dataset/kitti/train/2011_09_26_drive_0001_sync/
- 0620-supp/dataset/kitti/train/2011_09_26_drive_0001_sync/proj_depth/
- 0620-supp/dataset/kitti/train/2011_09_26_drive_0001_sync/proj_depth/groundtruth/
- 0620-supp/dataset/kitti/train/2011_09_26_drive_0001_sync/proj_depth/groundtruth/image_02/
- 0620-supp/dataset/kitti/train/2011_09_26_drive_0001_sync/proj_depth/groundtruth/image_03/
- 0620-supp/dataset/kitti/train/2011_09_26_drive_0001_sync/proj_depth/velodyne_raw/
- 0620-supp/dataset/kitti/train/2011_09_26_drive_0001_sync/proj_depth/velodyne_raw/image_02/
- 0620-supp/dataset/kitti/train/2011_09_26_drive_0001_sync/proj_depth/velodyne_raw/image_03/
- 0620-supp/dataset/kitti/val_selection_cropped/
- 0620-supp/dataset/kitti/val_selection_cropped/groundtruth_depth/
- 0620-supp/dataset/kitti/val_selection_cropped/image/
- 0620-supp/dataset/kitti/val_selection_cropped/intrinsics/
- 0620-supp/dataset/kitti/val_selection_cropped/velodyne_raw/
- 0620-supp/dataset/nyu/
- 0620-supp/dataset/nyu/converted/
- 0620-supp/dataset/nyu/converted/test/
- 0620-supp/dataset/nyu/converted/test/depths/
- 0620-supp/dataset/nyu/converted/test/depths/00001.npy
- 0620-supp/dataset/nyu/converted/train/
- 0620-supp/dataset/nyu/converted/train/depths/
- 0620-supp/dataset/nyu/converted/train/depths/basement_0001a/
- 0620-supp/dataset/nyu/converted/train/depths/basement_0001a/00001.npy
- 0620-supp/dataset/nyu/nyudepthv2/
- 0620-supp/dataset/nyu/nyudepthv2/train/
- 0620-supp/dataset/nyu/nyudepthv2/train/basement_0001a/
- 0620-supp/dataset/nyu/nyudepthv2/val/
- 0620-supp/dataset/nyu/nyudepthv2/val/official/
- 0620-supp/dataset/synthia/
- 0620-supp/dataset/synthia/train/
- 0620-supp/dataset/synthia/train/test5_10segs_weather_0_spawn_1_roadTexture_1_P_None_C_None_B_None_WC_None/
- 0620-supp/dataset/synthia/train/test5_10segs_weather_0_spawn_1_roadTexture_1_P_None_C_None_B_None_WC_None/19-10-2018_12-47-37/
- 0620-supp/dataset/synthia/train/test5_10segs_weather_0_spawn_1_roadTexture_1_P_None_C_None_B_None_WC_None/19-10-2018_12-47-37/Depth/
- 0620-supp/dataset/synthia/train/test5_10segs_weather_0_spawn_1_roadTexture_1_P_None_C_None_B_None_WC_None/19-10-2018_12-47-37/Depth/000101.png
- 0620-supp/dataset/synthia/train/test5_10segs_weather_0_spawn_1_roadTexture_1_P_None_C_None_B_None_WC_None/19-10-2018_12-47-37/SemSeg/
- 0620-supp/dataset/synthia/train/test5_10segs_weather_0_spawn_1_roadTexture_1_P_None_C_None_B_None_WC_None/19-10-2018_12-47-37/SemSeg/000101.png
- 0620-supp/model/
- 0620-supp/ReproducibilityChecklist.pdf
