# Supplementary material
Source: ML conference proceedings conference paper supplement (https://openaccess.thecvf.com/content/WACV2023/html/Ramesh_SIUNet_Sparsity_Invariant_WACV_2023_paper.html)
Supplement: Supplementary file 3 [file Ramesh_SIUNet_Sparsity_Invariant_WACV_2023_supplemental.zip › 0620-supp/code/requirements.txt]

absl-py==0.11.0
anyio==2.2.0
argon2-cffi==20.1.0
astunparse==1.6.3
async-generator==1.10
attrs==20.3.0
autopep8==1.6.0
Babel==2.9.0
backcall==0.2.0
bleach==3.3.0
cachetools==4.2.1
carla==0.9.11
certifi==2020.12.5
cffi==1.14.5
chardet==4.0.0
cloudpickle==1.6.0
colorama==0.4.4
cryptography==36.0.1
cvxpy==1.1.14
cycler==0.10.0
decorator==4.4.2
defusedxml==0.7.0
dill==0.3.4
ecos==2.0.7.post1
entrypoints==0.3
et-xmlfile==1.1.0
flatbuffers==1.12
gast==0.3.3
google-auth==1.27.0
google-auth-oauthlib==0.4.2
google-pasta==0.2.0
googleapis-common-protos==1.54.0
grpcio==1.32.0
h11==0.13.0
h5py==2.10.0
idna==2.10
imageio==2.9.0
importlib-resources==5.4.0
ipykernel==5.5.0
ipython==7.21.0
ipython-genutils==0.2.0
ipywidgets==7.6.3
jedi==0.18.0
Jinja2==2.11.3
joblib==1.0.1
json5==0.9.5
jsonschema==3.2.0
jupyter-client==6.1.11
jupyter-core==4.7.1
jupyter-packaging==0.7.12
jupyter-server==1.4.1
jupyterlab==3.0.9
jupyterlab-pygments==0.1.2
jupyterlab-server==2.3.0
jupyterlab-widgets==1.0.0
Keras-Preprocessing==1.1.2
keyboard==0.13.5
kiwisolver==1.3.1
kornia==0.4.1
Markdown==3.3.4
MarkupSafe==1.1.1
matplotlib==3.3.4
mistune==0.8.4
MouseInfo==0.1.3
nbclassic==0.2.6
nbclient==0.5.3
nbconvert==6.0.7
nbformat==5.1.2
nest-asyncio==1.5.1
networkx==2.6.3
notebook==6.2.0
numpy==1.19.5
numpy-stl==2.16.3
oauthlib==3.1.0
open3d==0.12.0
opencv-python==4.5.1.48
openpyxl==3.0.9
opt-einsum==3.3.0
osqp==0.6.2.post0
outcome==1.1.0
packaging==20.9
pandas==1.3.4
pandocfilters==1.4.3
parso==0.8.1
pickleshare==0.7.5
Pillow==8.1.1
prometheus-client==0.9.0
promise==2.3
prompt-toolkit==3.0.16
protobuf==3.15.4
pyasn1==0.4.8
pyasn1-modules==0.2.8
PyAutoGUI==0.9.53
pycodestyle==2.8.0
pycparser==2.20
pygame==2.0.1
PyGetWindow==0.0.9
Pygments==2.8.0
PyMsgBox==1.0.9
pyOpenSSL==21.0.0
pyparsing==2.4.7
pyperclip==1.8.2
PyQt6==6.0.2
PyQt6-Qt==6.0.1
PyQt6-sip==13.0.1
PyRect==0.1.4
pyrsistent==0.17.3
PyScreeze==0.1.28
python-dateutil==2.8.1
python-utils==3.1.0
pytweening==1.0.4
pytz==2021.1
PyWavelets==1.1.1
pywin32==300
pywinpty==0.5.7
pyzmq==22.0.3
qdldl==0.1.5.post0
requests==2.25.1
requests-oauthlib==1.3.0
rsa==4.7.2
scikit-image==0.18.3
scikit-learn==0.24.1
scipy==1.6.1
scs==2.1.4
selenium==4.1.0
Send2Trash==1.5.0
six==1.15.0
sniffio==1.2.0
sortedcontainers==2.4.0
spyder-kernels==2.0.4
tensorboard==2.4.1
tensorboard-plugin-wit==1.8.0
tensorflow-datasets==4.5.2
tensorflow-estimator==2.4.0
tensorflow-gpu @ https://storage.googleapis.com/tensorflow/windows/gpu/tensorflow_gpu-2.4.0-cp38-cp38-win_amd64.whl
tensorflow-metadata==1.6.0
termcolor==1.1.0
terminado==0.9.2
testpath==0.4.4
threadpoolctl==2.1.0
tifffile==2021.8.8
toml==0.10.2
torch==1.7.1+cu110
torchaudio==0.7.2
torchvision==0.8.2+cu110
tornado==6.1
tqdm==4.58.0
traitlets==5.0.5
trio==0.19.0
trio-websocket==0.9.2
typing-extensions==3.7.4.3
urllib3==1.26.3
wcwidth==0.2.5
webencodings==0.5.1
Werkzeug==1.0.1
widgetsnbextension==3.5.1
wrapt==1.12.1
wsproto==1.0.0
XlsxWriter==3.0.2
zipp==3.7.0
