# Supplementary material
Source: ML conference proceedings conference paper supplement (https://openaccess.thecvf.com/content/WACV2023/html/Ramesh_SIUNet_Sparsity_Invariant_WACV_2023_paper.html)

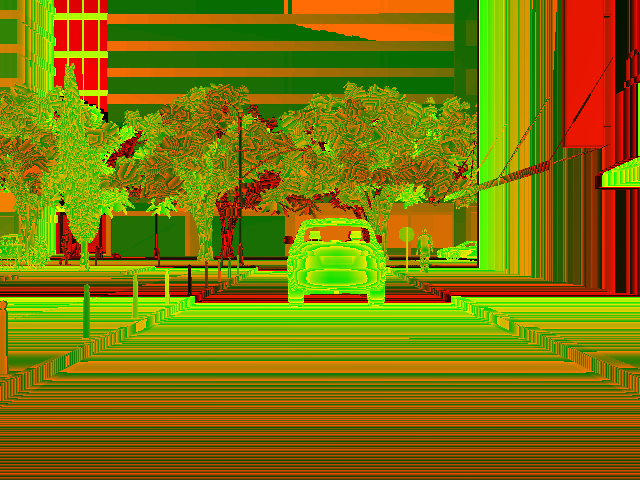

Supplement: Supplementary file 3 [file Ramesh_SIUNet_Sparsity_Invariant_WACV_2023_supplemental.zip › 0620-supp/dataset/synthia/train/test5_10segs_weather_0_spawn_1_roadTexture_1_P_None_C_None_B_None_WC_None/19-10-2018_12-47-37/Depth/000101.png]

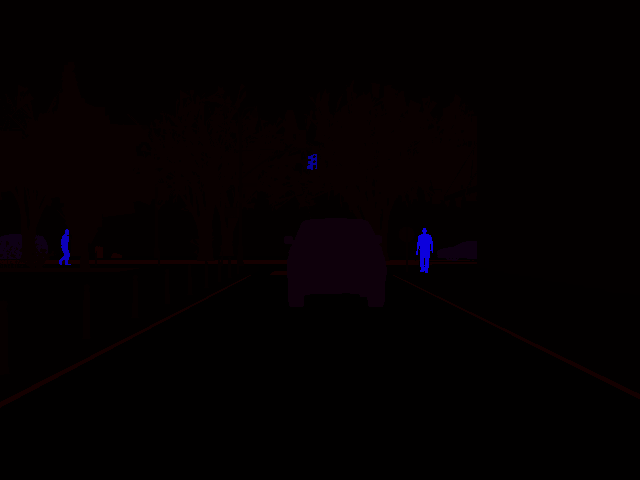

Supplement: Supplementary file 3 [file Ramesh_SIUNet_Sparsity_Invariant_WACV_2023_supplemental.zip › 0620-supp/dataset/synthia/train/test5_10segs_weather_0_spawn_1_roadTexture_1_P_None_C_None_B_None_WC_None/19-10-2018_12-47-37/SemSeg/000101.png]
